# Supplementary material for: From doping to composites: zirconia (ZrO 2 ) modified hematite photoanodes for water splitting
Source: Royal Society of Chemistry journal article supplement (doi:10.1039/d3ra05348b), 2023-01-01
Supplement: d3ra05348b1.pdf [file d3ra05348b1.pdf]

## SUPPLEMENTARY INFORMATION

# From Doping to Composites: Zirconia ( $\text{ZrO}_2$ ) Modified Hematite Photoanodes for Water Splitting

Saima Qureshi,<sup>a,b</sup> Duncan Gregory,<sup>b</sup> Asif Ali Tahir,<sup>c</sup> Safeer Ahmed.<sup>a,\*</sup>

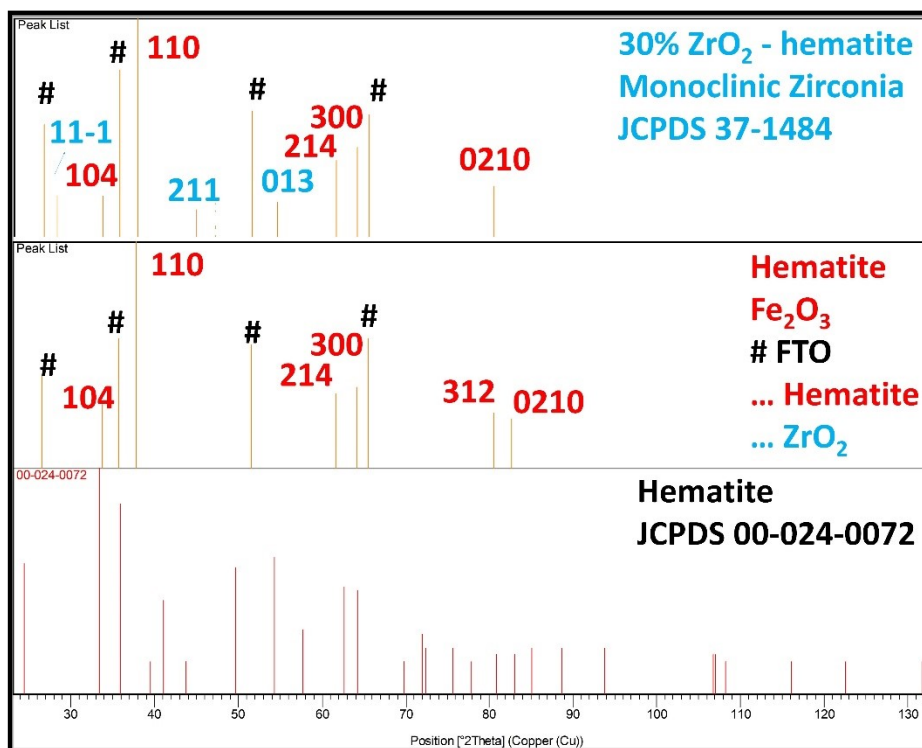

Fig S1(a) XRD line pattern for hematite as taken from the JCPDS (00-024-0072)

,experimental XRD patterns taken for a sample of pristine hematite and a sample of 30 wt.% zirconia/hematite deposited on FTO, respectively.

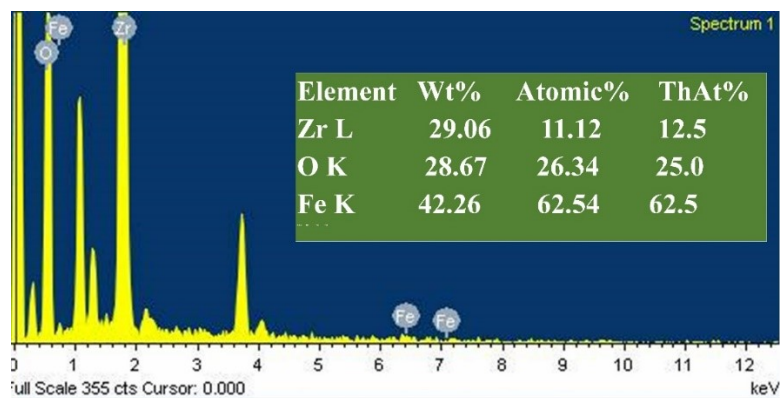

**Fig. S2.** EDX spectrum for a sample of 30 wt% zirconia added hematite. The corresponding quantitative analysis is provided in the inset table.

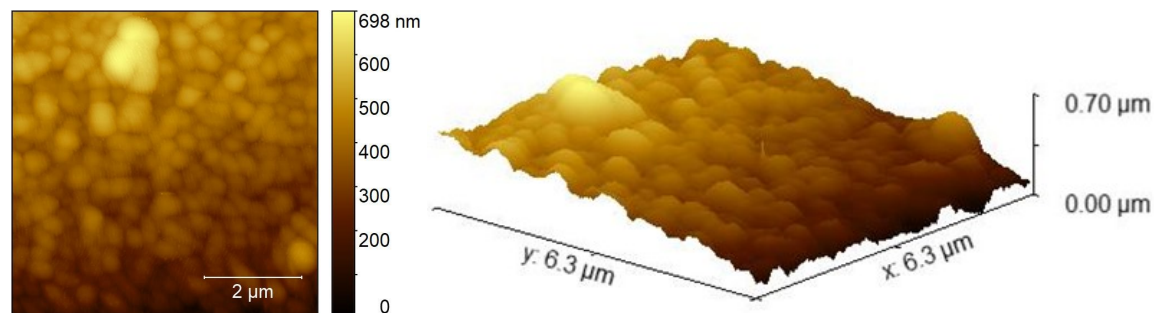

Roughness (Ra): 6.076 nm

Root mean square roughness (RMS): 7.641nm

**Fig.S3.** AFM images of  $ZrO_2/\alpha-Fe_2O_3$  (a) 2D and (b) 3D showing topography of the films and an estimation of the surface roughness.

**Table S1. Average crystallite size, from XRD data using Scherrer formula, of Zirconia added-  $\alpha$ -Fe<sub>2</sub>O<sub>3</sub> films prepared by AACVD method.**

| <b>Amount of added ZrO<sub>2</sub> / wt.%</b> | <b>Crystallite size / nm</b> |
|-----------------------------------------------|------------------------------|
| 2                                             | 7                            |
| 5                                             | 13                           |
| 10                                            | 17                           |
| 20                                            | 42                           |
| 30                                            | 14                           |
| 40                                            | 11                           |

**Table S2 Direct optical band gaps of zirconia added hematite as a function of composition as calculated from analysis of DR-UV-VIS data from K-M plots**

| Amount of added zirconia/wt%             | Band gap/eV |
|------------------------------------------|-------------|
| 0 (pure Fe <sub>2</sub> O <sub>3</sub> ) | 2.03        |
| 2                                        | 2.02        |
| 5                                        | 1.99        |
| 10                                       | 1.85        |
| 20                                       | 2.07        |
| 30                                       | 2.14        |
| 40                                       | 1.96        |
| 100 ( <i>m</i> - ZrO <sub>2</sub> )      | 3.6         |

**Table S3.% IPCE vs wave length and potential of 30% zirconia added hematite.**

| Photoanode                                               | % IPCE vs. Wavelength       | % IPCE vs. Potential |
|----------------------------------------------------------|-----------------------------|----------------------|
| Hematite                                                 | 18%@265 nm<br>18%@285 nm    | <u>0.53%@0.23 V</u>  |
| 30 wt.% ZrO <sub>2</sub> /Fe <sub>2</sub> O <sub>3</sub> | 48% @ 265 nm<br>58%@ 285 nm | <u>11%@0.23 V</u>    |

**Table S4. Photocurrents and onset potentials ( $E_{\text{onset}}$ ) for  $\text{ZrO}_2/\text{hematite}$  as a function of composition.**

| <b>Amount of added <math>\text{ZrO}_2</math> / wt. %</b> | <b><math>E_{\text{onset}} / \text{V}</math></b> | <b>Photocurrent density<br/><math>\text{mA}/\text{cm}^2</math><br/>@1.23V</b> |
|----------------------------------------------------------|-------------------------------------------------|-------------------------------------------------------------------------------|
| 0                                                        | 0.86                                            | 1.23                                                                          |
| 2                                                        | 0.95                                            | 0.21                                                                          |
| 5                                                        | 0.78                                            | 0.48                                                                          |
| 10                                                       | 0.78                                            | 0.63                                                                          |
| 20                                                       | 0.74                                            | 2.12                                                                          |
| 30                                                       | 0.73                                            | 3.06                                                                          |
| 40                                                       | 1.06                                            | 1.03                                                                          |

**Table S5. Electron lifetimes for hematite as compared to 30 wt.% zirconia/hematite**

| <b>Amount of added ZrO<sub>2</sub> / wt.%</b> | <b>Electron lifetime / ms</b> |
|-----------------------------------------------|-------------------------------|
| <b>0</b>                                      | <b>0.175</b>                  |
| <b>30</b>                                     | <b>1.690</b>                  |

**Table S6. Amounts of hydrogen and oxygen evolved (as determined by GC) as a function of time for pristine hematite and 30 wt.% zirconia/hematite**

| Time / h | H <sub>2</sub> evolved / μmol cm <sup>-2</sup> |                                                            | O <sub>2</sub> evolved / μmol cm <sup>-2</sup> |                                                            |
|----------|------------------------------------------------|------------------------------------------------------------|------------------------------------------------|------------------------------------------------------------|
|          | α-Fe <sub>2</sub> O <sub>3</sub>               | 30 wt.% ZrO <sub>2</sub> /α-Fe <sub>2</sub> O <sub>3</sub> | α-Fe <sub>2</sub> O <sub>3</sub>               | 30 wt.% ZrO <sub>2</sub> /α-Fe <sub>2</sub> O <sub>3</sub> |
| 1        | 0                                              | 0.27                                                       | 0.721                                          | 4.49                                                       |
| 2        | 0.45                                           | 0.47                                                       | 0.956                                          | 5.16                                                       |
| 3        | 0.121                                          | 0.69                                                       | 0.977                                          | 6.78                                                       |
| 4        | 0.215                                          | 0.74                                                       | 1.063                                          | 7.89                                                       |
| 5        | 0.328                                          | 0.94                                                       | 1.174                                          | 9.39                                                       |
| 6        | 0.402                                          | 1.02                                                       | 1.23                                           | 11.04                                                      |
